# Supplementary material for: Genetic Relationships, Carbendazim Sensitivity and Mycotoxin Production of the Fusarium Graminearum Populations from Maize, Wheat and Rice in Eastern China
Source: PubMed Central journal article supplement (PMC4147583; doi:10.3390/toxins6082291), 2014-08-04
Supplement: toxins-06-02291-s001.pdf [file toxins-06-02291-s001.pdf]

## Supplementary Information

**Table S1.** DON, ZEN production and EC<sub>50</sub> values to carbendazim of individual isolate from different hosts.

| strain | host  | ZEN    | DON    | EC50   | strain | host  | ZEN    | DON    | EC50   | strain | host | ZEN    | DON    | EC50   |
|--------|-------|--------|--------|--------|--------|-------|--------|--------|--------|--------|------|--------|--------|--------|
| JS01   | maize | 1.0454 | 0.4368 | 0.8932 | W6     | wheat | 0.6115 | 2.1253 | 0.6462 | R1     | rice | 0.3256 | 0.3509 | 0.7719 |
| JS02   | maize | 0.5874 | 0.6311 | 1.0768 | W12    | wheat | 0.2164 | 0.3632 | 0.6540 | R3     | rice | 0.4526 | 0.2958 | 0.5803 |
| JS03   | maize | 0.1268 | 0.3092 | 1.8349 | W17    | wheat | 1.0289 | 0.5530 | 0.5374 | R5     | rice | 0.0768 | -      | 0.6170 |
| JS04   | maize | 0.3533 | 1.8636 | 1.0241 | W26    | wheat | 0.3362 | 2.1357 | 3.8015 | R6     | rice | 0.7979 | 0.9718 | 0.6363 |
| JS05   | maize | 0.5494 | 1.0038 | 1.2159 | W29    | wheat | 0.1239 | 0.8006 | 0.6065 | R7     | rice | 0.5269 | -      | 0.6916 |
| JS06   | maize | 2.4132 | 1.5421 | 0.9864 | W33    | wheat | 0.1064 | -      | 0.6246 | R8     | rice | 0.1312 | -      | 0.6018 |
| JS07   | maize | 1.1192 | 0.7889 | 0.9667 | W38    | wheat | 0.1751 | -      | 0.6189 | R9     | rice | 0.8574 | 2.2613 | 4.5645 |
| JS08   | maize | 0.4614 | 0.4559 | 1.0928 | W41    | wheat | 0.0443 | 1.4758 | 3.9879 | R10    | rice | 0.0605 | 0.8236 | 0.5991 |
| JS09   | maize | 0.4209 | 0.7344 | 0.9972 | W57    | wheat | 1.5223 | 2.1710 | 6.3231 | R11    | rice | 0.0445 | -      | 0.7402 |
| JS10   | maize | 0.2735 | -      | 0.9098 | W60    | wheat | 0.0411 | 0.1435 | 0.5357 | R12    | rice | 1.4863 | 0.2640 | 0.5794 |
| JS11   | maize | 1.6855 | 0.6137 | 1.1603 | W61    | wheat | 0.2330 | 0.2647 | 0.5666 | R13    | rice | 0.3492 | 1.5065 | 3.6136 |
| JS12   | maize | 0.1275 | 2.7283 | 1.2737 | W62    | wheat | 0.1343 | 0.3309 | 0.4724 | R14    | rice | 0.5689 | 0.1178 | 0.6766 |
| JS13   | maize | 0.1621 | 0.6346 | 0.8738 | W63    | wheat | 0.0358 | 0.1223 | 0.5086 | R15    | rice | 0.3423 | 0.0745 | 0.6561 |
| JS14   | maize | 0.0515 | -      | 0.8043 | W64    | wheat | 0.6413 | 3.0520 | 4.6457 | R16    | rice | 0.0935 | 0.1223 | 0.7442 |
| JS15   | maize | 0.0946 | -      | 1.0766 | W66    | wheat | 0.8539 | 0.8376 | 0.4967 | R18    | rice | 0.5633 | 0.9133 | 0.7218 |
| JS16   | maize | 0.3735 | 0.5250 | 1.2586 | W68    | wheat | 0.9534 | 0.8583 | 0.5705 | R19    | rice | 0.0642 | 0.1903 | 0.6233 |
| JS17   | maize | 2.5753 | 0.5678 | 0.9329 | W205   | wheat | 0.0735 | 0.1776 | 0.5901 | R20    | rice | 0.0422 | 0.9068 | 0.6113 |
| JS18   | maize | 2.2780 | 0.1430 | 1.1418 | W206   | wheat | 0.4640 | -      | 4.1132 | R21    | rice | 0.0485 | 2.9649 | 0.6415 |
| JS19   | maize | 2.0139 | 0.4184 | 0.9917 | W209   | wheat | 0.0346 | 0.8712 | 4.6457 | R22    | rice | 0.0355 | -      | 0.7963 |
| JS20   | maize | 0.6479 | 0.6177 | 0.8557 | W2017  | wheat | 0.5642 | 0.1611 | 0.7684 | R23    | rice | 0.4252 | 0.6761 | 0.6338 |
| JS21   | maize | 0.3337 | 0.1878 | 0.9927 | W2027  | wheat | 0.1343 | 0.3537 | 0.6166 | R24    | rice | 0.0584 | 0.1435 | 0.6662 |
| JS22   | maize | 0.3523 | 1.1062 | 0.8957 | W2030  | wheat | 0.0913 | -      | 0.6018 | R25    | rice | 0.0410 | 0.2647 | 0.6105 |
| JS23   | maize | 0.6106 | 0.3696 | 1.1713 | W2032  | wheat | 0.0156 | 1.7477 | 0.5967 | R26    | rice | 0.8840 | 0.3309 | 0.7360 |
| JS24   | maize | 0.1406 | 2.8419 | 0.8949 | W2038  | wheat | 1.1983 | 0.0374 | 0.5806 | R28    | rice | 0.2913 | 1.4032 | 3.6260 |
| AH03   | maize | 2.9538 | 0.3572 | 0.8774 | W2045  | wheat | 0.7127 | 0.8039 | 3.4934 | R29    | rice | 0.8151 | 1.4745 | 3.6724 |
| AH04   | maize | 0.9843 | 1.0151 | 0.8792 | W2050  | wheat | 0.0491 | 0.1085 | 0.6213 | R31    | rice | 0.0815 | -      | 0.5898 |
| AH06   | maize | 2.0982 | 1.7141 | 0.8968 | W2051  | wheat | 0.0536 | 0.3572 | 0.5772 | R32    | rice | 0.4719 | -      | 0.6932 |

**Table S1.** *Cont.*

| <b>strain</b> | <b>host</b> | <b>ZEN</b> | <b>DON</b> | <b>EC50</b> | <b>strain</b> | <b>host</b> | <b>ZEN</b> | <b>DON</b> | <b>EC50</b> | <b>strain</b> | <b>host</b> | <b>ZEN</b> | <b>DON</b> | <b>EC50</b> |
|---------------|-------------|------------|------------|-------------|---------------|-------------|------------|------------|-------------|---------------|-------------|------------|------------|-------------|
| AH07          | maize       | 1.4308     | 0.1085     | 0.7594      | W2054         | wheat       | 0.5628     | -          | 0.6651      | R37           | rice        | 1.1765     | 0.1085     | 0.6165      |
| AH08          | maize       | 0.5188     | 2.6858     | 1.1015      | W2055         | wheat       | 0.0335     | -          | 0.6334      | R39           | rice        | 0.0847     | 0.3123     | 0.5802      |
| AH10          | maize       | 2.2239     | 0.3123     | 1.1568      | W2059         | wheat       | 0.2813     | 0.4180     | 5.1661      | R40           | rice        | 0.5384     | 2.6858     | 5.6145      |
| AH11          | maize       | 1.2973     | 0.1611     | 0.7816      | W2063         | wheat       | 0.5295     | 0.7791     | 0.5687      |               |             |            |            |             |
| AH13          | maize       | 2.4256     | 0.8357     | 0.9174      | W2065         | wheat       | 0.0832     | -          | 0.6291      |               |             |            |            |             |
| AH37          | maize       | 0.1338     | 0.2019     | 0.8215      | W2066         | wheat       | 0.6225     | -          | 3.3955      |               |             |            |            |             |
|               |             |            |            |             | W2067         | wheat       | 0.1278     | 0.0582     | 0.6853      |               |             |            |            |             |
